# Supplementary material
Source: PubMed Central journal article supplement (PMC5865051)
Supplement: IAI.00759-17_zii999092333s1.pdf [file IAI.00759-17_zii999092333s1.pdf]

Single cytokine or chemokine that predictors with ROC curve AUC values for G-series Human Inflammation Antibody Array 3 (HIAA) in the comparison of healthy control and LTBI groups

| Test Result Variable(s) | Area | Std. Error <sup>a</sup> | Asymptotic Sig. <sup>b</sup> | Asymptotic 95% Confidence Interval |             |
|-------------------------|------|-------------------------|------------------------------|------------------------------------|-------------|
|                         |      |                         |                              | Interval                           |             |
|                         |      |                         |                              | Lower Bound                        | Upper Bound |
| EOTAXIN                 | .515 | .077                    | .846                         | .364                               | .666        |
| EOTAXIN-2               | .457 | .077                    | .570                         | .306                               | .607        |
| GCSF                    | .530 | .077                    | .692                         | .380                               | .681        |
| GM-CSF                  | .498 | .078                    | .981                         | .345                               | .651        |
| ICAM-1                  | .526 | .078                    | .738                         | .373                               | .678        |
| IFN-gamma               | .911 | .043                    | .000                         | .826                               | .995        |
| I-309                   | .581 | .076                    | .287                         | .433                               | .730        |
| IL-1 a                  | .649 | .076                    | .051                         | .500                               | .799        |
| IL-1 b                  | .514 | .077                    | .858                         | .363                               | .665        |
| IL-2                    | .649 | .074                    | .051                         | .504                               | .794        |
| IL-3                    | .560 | .076                    | .432                         | .411                               | .709        |
| IL-4                    | .599 | .076                    | .194                         | .451                               | .748        |
| IL-6                    | .396 | .075                    | .174                         | .249                               | .543        |
| IL-6 sR                 | .600 | .076                    | .189                         | .452                               | .749        |
| IL-7                    | .592 | .076                    | .228                         | .442                               | .742        |
| IL-8                    | .472 | .078                    | .715                         | .320                               | .624        |
| IL-10                   | .479 | .077                    | .786                         | .328                               | .630        |
| IL-11                   | .497 | .079                    | .969                         | .343                               | .651        |
| IL-12 p40               | .514 | .078                    | .858                         | .362                               | .666        |
| IL-12 p70               | .565 | .077                    | .397                         | .415                               | .715        |
| IL-13                   | .644 | .073                    | .059                         | .501                               | .788        |
| IL-15                   | .616 | .075                    | .129                         | .470                               | .762        |
| IL-16                   | .570 | .076                    | .363                         | .420                               | .719        |
| IL-17                   | .763 | .062                    | .001                         | .641                               | .886        |
| IP-10                   | .559 | .076                    | .441                         | .410                               | .708        |
| MCP-1                   | .542 | .078                    | .581                         | .388                               | .696        |
| MCP-2                   | .624 | .076                    | .104                         | .475                               | .773        |
| M-CSF                   | .630 | .074                    | .089                         | .484                               | .776        |
| MIG                     | .503 | .077                    | .969                         | .352                               | .654        |
| MIP-1a                  | .566 | .077                    | .388                         | .415                               | .717        |
| MIP-1b                  | .609 | .074                    | .155                         | .463                               | .755        |
| MIP-1d                  | .455 | .077                    | .560                         | .304                               | .606        |

|           |      |      |      |      |      |
|-----------|------|------|------|------|------|
| RANTES    | .570 | .077 | .363 | .418 | .721 |
| TGF-b1    | .579 | .077 | .301 | .428 | .730 |
| TNF-a     | .562 | .079 | .414 | .408 | .717 |
| TNF-b     | .604 | .076 | .174 | .455 | .753 |
| s TNF RI  | .543 | .078 | .570 | .390 | .697 |
| s TNF RII | .470 | .077 | .692 | .318 | .621 |
| PDGF-BB   | .546 | .077 | .549 | .396 | .696 |
| TIMP-2    | .476 | .077 | .750 | .325 | .626 |

a. Under the nonparametric assumption

b. Null hypothesis: true area = 0.5
